# Supplementary material for: Molecular and genetic landscapes of retina and brain microglia in neurodegenerative diseases
Source: HighWire-hosted journal article supplement (doi:10.1101/gr.280554.125), 2025-08-26
Supplement: Supplemental_Table_S1.xlsx [file Supplemental_Table_S1.xlsx]

## Sheet: Dataset
Supplemental Table 1: The sources of data that were used in the study
Resource	The name of the resource
Source	Where the data came from
Identifier	GEO identification number or the website linking to the data
REAGENT or RESOURCE	SOURCE	IDENTIFIER
Deposited data
1000 Genome Project	The 1000 Genomes Project Consortium (Genomes Project et al. 2015)	http://www.1000genomes.org/;
		RRID:SCR_006828
Single Nuclei RNA-seq retina data (RETINA)	Wang et al. (Wang et al. 2022),	GSE196235,
	Orozco et al. (Orozco et al. 2020),	https://doi.org/10.5281/zenodo.7532115,
	Kuchroo et al. (Kuchroo et al. 2023),	GSE221042,
	Yu et al (Yu et al. 2024)	GSE208434
	GSE203499	GSE203499
Single Nuclei RNA-seq data (BRAIN)	Haney et al. (Haney et al. 2024),	GSE254205,
	Sepp et al. (Sepp et al. 2024),	https://cellxgene.cziscience.com/collections/72d37bc9-76cc-442d-9131-da0e273862db,
	Velmeshev et al. (Velmeshev et al. 2023)	https://cellxgene.cziscience.com/collections/bacccb91-066d-4453-b70e-59de0b4598cd
Single Nuclei ATAC-seq data (RETINA)	Wang et al (Wang et al. 2022),	GSE196235,
	Orozco et al. (Orozco et al. 2020),	https://doi.org/10.5281/zenodo.7532115
	Wang et al. (Wang et al. 2023)	GSE247157
Single Nuclei ATAC-seq data (BRAIN)	Morabito et al. (Morabito et al. 2021),	GSE174367,
	Zhu et al. (Zhu et al. 2023),	GSE204682,
	Corces et al. (Corces et al. 2020)	GSE147672
AMD GWAS summary statistics	Fritsche et al. (Fritsche et al. 2016)	https://www.ebi.ac.uk/gwas/publications/26691988
AD GWAS summary statistics	Bellenguez et al (Bellenguez et al. 2022)	https://www.ebi.ac.uk/gwas/publications/35379992

## Sheet: RNA
Supplemental Table 1: Donor information for snRNA-seq samples
Tissue	Dataset	Sample	Gender	Age	Status	Death-to-preservation interval (hours)	Ethnicity/race	Cause of death	Study eye (OD or OS)	medical_history
Retina	GSE196235	LVG1OD	Male	55	Control	9		Cardiac arrest	OD
Retina	GSE196235	LVG1OS	Male	55	Control	9		Cardiac arrest	OS
Retina	GSE196235	LGS1OD	Female	85	Control	11		Sepsis	OD
Retina	GSE196235	LGS1OS	Female	85	Control	11		Sepsis	OS
Retina	GSE196235	LGS2OD	Male	87	Control	9		Fall	OD
Retina	GSE196235	LGS2OS	Male	87	Control	9		Fall	OS
Retina	GSE196235	LGS3OD	Female	74	Control	12		Dementia	OD
Retina	GSE196235	LGS3OS	Female	74	Control	12		Dementia	OS
Retina	ZEN7532115	SAM24377567	Male	84	Control	< 6
Retina	ZEN7532115	SAM24377569	Female	71	Control	< 6
Retina	ZEN7532115	SAM24377571	Male	67	Control	< 6
Retina	ZEN7532115	SAM24377574	Female	70	Control	< 6
Retina	ZEN7532115	SAM24377575	Male	79	Control	< 6
Retina	ZEN7532115	SAM24377576	Male	70	Control	< 6
Retina	ZEN7532115	SAM24377577	Male	65	Control	< 6
Retina	GSE221042	HC1969	Male	65	Control	8
Retina	GSE221042	HC2003	Male	78	Control	4				Hypertension
Retina	GSE221042	HC2016	Female	72	Control	4
Retina	GSE221042	HC2229	Male	85	Control	3
Retina	GSE221042	A19-0065	Female	90	Control	2
Retina	GSE221042	1941W	Female	81	Control	4
Retina	GSE208434	SampleTag_2	Male	83	Control	< 8	White		OS
Retina	GSE208434	SampleTag_3	Female	90-105	Control	< 8	White		OD
Retina	GSE208434	SampleTag_5	Male	90-105	Control	< 8	White
Retina	GSE203499	0511	Female	76	Control	< 6	White			Cataract Surgery
Retina	GSE203499	0824	Male	84	Control	< 6	White			Heart Disease
Retina	GSE203499	0826	Female	88	Control	< 6	Black			Hypertension
Retina	GSE203499	0122	Female	89	Control	< 6	White			cataract surgery
Brain	GSE254205	1244	Female	80	Control	2.88
Brain	GSE254205	1402	Female	86	Control	2.33
Brain	GSE254205	1420	Female	93	Control	2.33
Brain	GSE254205	1629	Male	96	Control	5.03
Brain	GSE254205	1630	Male	101	Control	2.77
Brain	GSE254205	1820	Male	87	Control	3.32
Brain	GSE254205	1868	Male	96	Control	4.67
Brain	GSE254205	1875	Female	81	Control	2.72
Brain	Sepp Cerebellum	#105	Female	42	Control			Suicide (hanging)
Brain	Sepp Cerebellum	#138	Male	52	Control			Suicide (hanging)
Brain	Velmeshev Cortical	5958_BA24	Male	22	Control	24
Brain	Velmeshev Cortical	5577_BA9	Male	21	Control	19
Brain	Velmeshev Cortical	5958_BA9	Male	22	Control	24
Brain	Velmeshev Cortical	5787_BA9	Male	39	Control	16
Brain	Velmeshev Cortical	5609_BA9	Female	54	Control	6
Brain	Velmeshev Cortical	5546_BA9	Female	34	Control	27
Brain	Velmeshev Cortical	5981_BA9	Female	44	Control	19
Brain	Velmeshev Cortical	2C	Female	45	Control	12
Brain	Velmeshev Cortical	20C	Female	53	Control	23
Brain	Velmeshev Cortical	31C	Male	28	Control	6
Brain	Velmeshev Cortical	RL2123	Female	20	Control	19
Brain	Velmeshev Cortical	RL2124	Male	40	Control	9
Brain	Velmeshev Cortical	RL2128	Female	20	Control	17
Brain	Velmeshev Cortical	RL2132	Female	25	Control	24

## Sheet: ATAC
Supplemental Table 1: Donor information for snATAC-seq samples
Tissue	Dataset	Sample	Gender	Age	Status	Death-to-preservation interval (hours)	Ethnicity/race	Cause of death	Study eye (OD or OS)	medical_history
Retina	GSE196235	LVG1OD	Male	55	Control	9		Cardiac arrest	OD
Retina	GSE196235	LVG1OS	Male	55	Control	9		Cardiac arrest	OS
Retina	GSE196235	LGS1OD	Female	85	Control	11		Sepsis	OD
Retina	GSE196235	LGS1OS	Female	85	Control	11		Sepsis	OS
Retina	GSE196235	LGS2OD	Male	87	Control	9		Fall	OD
Retina	GSE196235	LGS2OS	Male	87	Control	9		Fall	OS
Retina	GSE196235	LGS3OD	Female	74	Control	12		Dementia	OD
Retina	GSE196235	LGS3OS	Female	74	Control	12		Dementia	OS
Retina	ZEN7532115	LIB5437627_SAM24396394	Male	67	Control	< 6
Retina	ZEN7532115	LIB5437629_SAM24396395	Female	71	Control	< 6
Retina	ZEN7532115	LIB5437642_SAM24396402	Male	79	Control	< 6
Retina	ZEN7532115	LIB5437640_SAM24396401	Female	70	Control	< 6
Retina	ZEN7532115	LIB5437634_SAM24396398	Male	70	Control	< 6
Retina	ZEN7532115	LIB5437628_SAM24396395	Female	71	Control	< 6
Retina	ZEN7532115	LIB5437625_SAM24396393	Male	84	Control	< 6
Retina	ZEN7532115	LIB5437635_SAM24396398	Male	70	Control	< 6
Retina	ZEN7532115	LIB5437626_SAM24396394	Male	67	Control	< 6
Retina	ZEN7532115	LIB5437641_SAM24396401	Female	70	Control	< 6
Retina	ZEN7532115	LIB5437632_SAM24396397	Male	65	Control	< 6
Retina	ZEN7532115	LIB5437624_SAM24396393	Male	84	Control	< 6
Retina	ZEN7532115	LIB5437633_SAM24396397	Male	65	Control	< 6
Retina	ZEN7532115	LIB5437643_SAM24396402	Male	79	Control	< 6
Retina	GSE247157	19-D003	Male	86	Control	< 6	European
Retina	GSE247157	19-D006	Male	>89	Control	< 7	European
Retina	GSE247157	19-D007	Male	66	Control	< 8	European
Retina	GSE247157	19-D010	Female	88	Control	< 9	European
Retina	GSE247157	19-D011	Female	>89	Control	< 10	European
Retina	GSE247157	19-D019	Female	82	Control	< 11	European
Retina	GSE247157	D005-13	Male	80	Control	< 12	European
Retina	GSE247157	D013-13	Male	69	Control	< 13	European
Retina	GSE247157	D017-13	Male	65	Control	< 14	European
Retina	GSE247157	D018-13	Female	>89	Control	< 15	European
Retina	GSE247157	D019-13	Male	82	Control	< 16	European
Retina	GSE247157	D021-13	Male	86	Control	< 17	European
Retina	GSE247157	D026-13	Male	81	Control	< 18	European
Retina	GSE247157	D027-13	Male	77	Control	< 19	European
Retina	GSE247157	D028-13	Male	67	Control	< 20	European
Retina	GSE247157	D030-13	Female	73	Control	< 21	European
Brain	GSE174367	Sample-101	Female	74	Control	7.75
Brain	GSE174367	Sample-52	Male	83	Control	1.8
Brain	GSE174367	Sample-58	Male	90	Control	4
Brain	GSE174367	Sample-66	Female	90	Control	2.92
Brain	GSE204682	Adult1	Female	20	Control
Brain	GSE204682	Adult2	Male	39	Control
Brain	GSE147672	11_0393 (hippo2)	Male	91	Control	5	European
Brain	GSE147672	14_0586 (hippo1)	Female	95	Control	3.08	European
