# Supplementary material for: Molecular and genetic landscapes of retina and brain microglia in neurodegenerative diseases
Source: HighWire-hosted journal article supplement (doi:10.1101/gr.280554.125), 2025-08-26
Supplement: Supplemental_Table_S2.xlsx [file Supplemental_Table_S2.xlsx]

## Sheet: Cell Type Markers
Supplemental Table S2: Marker genes were curated from selected publications to identify cell types
Retina				Brain
Cell Type	Genes	Source		Cell Type	Genes	Source
Amacrine	GAD1	Menon et al. 2019 Yan et al. 2020		Oligodendrocyte	PDGFRA	Haney et al. 2024
	CALB1				PTPRZ1
	CHAT				SOX10
	NRXN2				MOG
	GAD2			Excitatory Neurons	SLC17A7	Haney et al. 2024
Astrocyte	GFAP	Menon et al. 2019 Yan et al. 2020			SATB2
	SOX9			Inhibitory Neurons	GAD1	Haney et al. 2024
	PAX2				GAD2
	PAX5			Endothelial Cells	CLDN5	Haney et al. 2024
	PAX8			Astrocyte	AQP4	Haney et al. 2024
	TNC				GFAP
Cones	ARR3	Menon et al. 2019 Yan et al. 2020			SLC1A2
	GNAT2			Microglia	TREM2	Butovsky and Weiner 2018 O'Koren et al. 2019 Bloomfield et al. 2024 Yu et al. 2024
	PDE6H				CX3CR1
	GUCA1C				TMEM119
	OPN1LW				HLA-DPA1
Horizontal	ONECUT2	Menon et al. 2019 Yan et al. 2020			HLA-DPB1
	ONECUT1				HLA-DRA
	LIM1				CD68
Microglia	TREM2	Butovsky and Weiner 2018 O'Koren et al. 2019 Bloomfield et al. 2024 Yu et al. 2024			S22
	CX3CR1				C1QA
	TMEM119				P2RY12
	HLA-DPA1				AIF1
	HLA-DPB1			Perivascular Macrophage	LYVE1	Butovsky and Weiner 2018 O'Koren et al. 2019 Bloomfield et al. 2024 Yu et al. 2024
	HLA-DRA				CD163
	CD68				MRC1
	S22				SIGLEC1
	C1QA			Monocyte-derived Macrophage	CCR2	Butovsky and Weiner 2018 O'Koren et al. 2019 Bloomfield et al. 2024 Yu et al. 2024
	P2RY12				CD36
	AIF1				PLAC8
Perivascular Macrophage	LYVE1	Butovsky and Weiner 2018 O'Koren et al. 2019 Bloomfield et al. 2024 Yu et al. 2024
	CD163			Monocyte	CD14	Butovsky and Weiner 2018 O'Koren et al. 2019 Hao et al. 2021 Bloomfield et al. 2024 Yu et al. 2024
	MRC1				CD16
	SIGLEC1				LY6H
Monocyte-derived Macrophage	CCR2	Butovsky and Weiner 2018 O'Koren et al. 2019 Bloomfield et al. 2024 Yu et al. 2024			SPN
	CD36				ACE
	PLAC8				CXCR2
					PTPRC
Monocyte	CD14	Butovsky and Weiner 2018 O'Koren et al. 2019 Hao et al. 2021 Bloomfield et al. 2024 Yu et al. 2024			FCGR3A
	CD16				LY6C
	LY6H
	SPN
	ACE
	CXCR2
	PTPRC
	FCGR3A
	LY6C
Müller Glia	CA2	Menon et al. 2019 Yan et al. 2020
	SLC1A3
	RLBP1
	GLUL
	CLU
	DKK3
	S100B
	HKDC1
	MYO3A
ON Cone Bipolar	VSX2	Menon et al. 2019 Yan et al. 2020
	GNAO1
	OTX2
	LHX4
	VSX1
	TRPM1
	ISL1
	GRM6
OFF Cone Bipolar	GRIK1	Yan et al. 2020
RGC	NEFL	Menon et al. 2019 Yan et al. 2020
	NEFM
	RBPMS
	SNCG
	ATOH7
	POU4F1
	POU4F2
	POU4F3
	GAP43
	THY1
	PRPH
Rod Bipolar	PCP2	Menon et al. 2019 Yan et al. 2020
	PRKCA
	NIF3L1
Rods	RHO	Menon et al. 2019 Yan et al. 2020
	PDE6B
	PDE6A
RPE	RPE65	Orozco et al. 2023
	BEST1
	COL8A1

## Sheet: Subclustering Markers
Supplemental Table S2: Markers used for subclustering the initial microglia cluster with first five columns coming from the DE results in Bloomfield et al. 2024 Yu et al. 2024
DE Genes					Markers
hMG1	hMG2	hMG3	mo-MFs	PVM	PVM	MM	Monocyte	Microglia (B)	Microglia (R)
C3	ABL2	A2M	AC010491.1	ALDH1A1	LYVE1	CCR2	CXCR2	TREM2	TREM2
CERNA2	ACSL4	ABCA1	ACTB	ANKRD37		CD36	PTPRC	TMEM119	TMEM119
CPVL	ACTB	ADAMTS1	ACTG1	ANXA1				P2RY12	P2RY12
FCGBP	ACTG1	ADGRE5	ACTR2	ARRDC3					HLA-DPA1
HAMP	ACTR2	ADM	ACTRT3	ATF3					HLA-DPB1
HTRA1	ADAM8	AK4	ADRB1	AZIN1.AS1					HLA-DRA
IGHM	ADGRE2	AKAP12	AHR	BAG3					CD74
IGKC	ALDOC	AL118516.1	AKR1C3	BCAS2					CSF1R
NR4A1	ALOX5AP	ANGPTL4	AL138899.1	BTG2					ITGAX
SMC4	ANXA2	ANKRD37	AL445524.1	C1QA
ZNF618	APOC1	APOC1	ALOX5AP	C1QB
	APOE	APOD	ANXA2	C1QC
	AQP9	APOE	APOBEC3A	C5AR1
	AREG	ARL4C	AREG	CCL3
	ARHGDIB	ARL5B	ARHGDIB	CCL3L1
	ARID5B	ATF5	ARL4D	CCL4
	ARL5B	BASP1	ARPC5	CCL5
	B3GNT5	C11orf96	ATP1B1	CCL8
	BASP1	C1R	BAG3	CD14
	BCL2A1	C1S	BCAS2	CD163
	BHLHE41	CAMK2N1	C11orf96	CD209
	BIRC3	CD48	C15orf48	CD83
	C15orf48	CD55	CA2	CDKN1C
	C3	CERNA2	CCDC71L	CEMIP2
	C5AR1	CFH	CCL20	CITED2
	CALM1	CHI3L2	CCL22	CLEC4E
	CALR	CHST2	CCR1	CR1
	CCL2	CLU	CD14	CTC1
	CCL20	COL27A1	CD1E	CTSD
	CCL3	CP	CD300E	CTSL
	CCL3L1	DNAH11	CD52	CXCL1
	CCL4	EFEMP1	CD69	CXCL10
	CCL4L2	EGLN3	CDC42EP3	CXCL12
	CCR1	ENO2	CDKN1C	CXCL2
	CCR7	EREG	CFL1	CXCL3
	CD14	FAM13A	CFP	CXCL8
	CD300E	FLNA	CKS2	DNAJB1
	CD44	FLT1	CLEC10A	DNAJB4
	CD55	FN1	CLEC5A	DUSP2
	CD83	GATM	CNN2	DUSP6
	CDC42EP3	GDF15	COTL1	EGR1
	CFL1	GPNMB	CPVL	EGR2
	CH25H	GPX3	CRYAB	EGR4
	COTL1	H1FX	CSTA	EIF4E
	CSTA	HILPDA	CSTB	ELL2
	CSTB	HK2	CXCL10	F13A1
	CXCL8	IGF2	CXCR4	FILIP1L
	CYBB	IGFBP4	DDIT4	FOLR2
	DDX3Y	IGFBP5	DNAJB1	FTL
	DHCR24	IL2RG	DNAJB4	GLUL
	DNAAF1	ISYNA1	DUSP4	GPR84
	DUSP2	KDM5B	DUSP5	GPX3
	DUSP4	KYNU	EMP3	HBA1
	DUSP5	LEPR	EREG	HBA2
	DUSP6	MAFF	FABP5	HBB
	EGR3	MAP1B	FAM43A	HBEGF
	EIF4E	MEG3	FBP1	HERPUD1
	ELL2	MFAP4	FCGR2B	HIST1H2BG
	EMP1	MGP	FCGR3A	HMOX1
	EMP3	MMP2	FDFT1	HSP90AA1
	ENO2	NCOA7	FGR	HSP90B1
	EREG	NDRG1	FKBP1A	HSPA1A
	EZR	NFIA	FPR1	HSPA1B
	FABP5	NFIX	FPR3	HSPA1L
	FADS1	NLRP3	G0S2	HSPA5
	FAM107B	NR1D1	GBP1	HSPA8
	FAM13A	NUPR1	GCA	HSPB1
	FBP1	PADI2	GDF15	HSPD1
	FCGBP	PIM2	GEM	HSPH1
	FCGR2B	PLA2G2A	GLIPR2	ICAM1
	FCGR3A	PLBD1	GPAT3	IER3
	FDFT1	PLOD2	GPR171	IFIT2
	FILIP1L	PNCK	GZF1	IL10
	FLNA	RAB42	H3F3A	IL1B
	FLT1	RARRES1	HBEGF	IL2RA
	FN1	RGCC	HCAR2	IL6
	FTH1	RHOBTB3	HCAR3	IQGAP2
	G0S2	SCD	HERPUD1	JMY
	GLDN	SERPINE1	HES1	JUN
	GLRX	SGK1	HHEX	KCNQ1OT1
	GNB1	SIDT2	HIST1H2BD	KLF2
	GPR183	SLC25A37	HIST3H2A	LGMN
	GPR84	SLC2A3	HLA.DQA1	LILRB5
	H3F3A	SLC39A14	HLA.DRA	LUCAT1
	HAMP	SNHG12	HMGB2	LY6K
	HK2	SYNE2	HMOX1	LYVE1
	HLA.DQA1	TAGLN	HOXB2	MERTK
	HLA.DRA	TAGLN2	HSP90AA1	MIR3945HG
	HMGCS1	TGM2	HSPA1A	MMP19
	ICAM1	TIMP1	HSPA1B	MRC1
	IL10	TIMP3	HSPA1L	MS4A4A
	IL1A	TNS1	HSPA6	MS4A7
	IL1B	TRIB2	HSPA8	NEURL2
	IL1R2	UACA	HSPB1	NFKBIA
	IL1RN	VIM	HSPD1	NR4A2
	INHBA	XIST	ID2	OSM
	INSIG1	Z98257.1	ID3	OTUD1
	IRF8	ZEB1	IER5	PAPSS2
	KMO	ZMAT3	IFITM1	PDIA4
	LCP1		IFITM2	PDK4
	LDLR		IFITM3	PLAU
	LFNG		IGFBP7	PLTP
	LGALS1		IL10	PMP22
	LGALS3		IL18R1	RASGEF1B
	LHFPL2		IL1R2	RGL1
	LIPA		IL1RN	RGS2
	LMNA		IL23A	RHOB
	LUCAT1		IRF1	RNASE1
	LYN		IRF4	RND3
	MAFF		JUN	S100A8
	MIR155HG		KBTBD8	SELENOP
	MIR3945HG		KLF2	SERPING1
	MMP19		KLF9	SIGLEC1
	MS4A7		LCP1	SLC7A8
	MSMO1		LGALS1	SOD2
	MT2A		LIF	TCEAL9
	NAMPT		LILRA5	TFRC
	NDRG1		LINC00243	THBS1
	NEDD9		LYPD3	TNF
	NFKBIA		LYZ	TNFAIP3
	NFKBID		MARCKSL1	TNFAIP6
	NLRP3		MCEMP1	TSC22D1
	NR4A3		MID1IP1	VSIG4
	NRIP3		MNDA	XIST
	OLR1		MTPN	ZBTB10
	OTUD1		MXD1	ZFAND2A
	PADI2		NET1	ZFP36
	PAG1		NRARP
	PDGFB		NUAK2
	PFN1		OLIG1
	PHLDA1		P2RY1
	PLAU		PDK4
	PLEK		PFN1
	PLIN2		PHACTR1
	PLP2		PHLDA1
	PPDPF		PHLDA2
	PPIF		PID1
	PRDM1		PIM1
	PSAP		PKIB
	PTGS2		PLAC8
	RAC2		PLK2
	RASGEF1B		PLP2
	RBBP8		PPA1
	RCAN1		PRRG4
	RGCC		PTGS2
	RGS16		PTX3
	RNASE2		QPCT
	RNF19B		RAB27A
	RUNX3		RAC2
	S100A10		RASD1
	S100A11		RGS1
	S100A4		RGS2
	S100A6		RHOB
	S100A8		RIPOR2
	S100A9		RND1
	SCD		RSAD2
	SCIN		S100A10
	SDC4		S100A11
	SERPINB1		S100A4
	SERPINB9		S100A6
	SGK1		S100A8
	SH3BGRL3		S100A9
	SIGLEC10		SELL
	SLC25A19		SERPINH1
	SLC25A37		SH3BGRL3
	SLC2A3		SIGLEC10
	SLC2A5		SLAMF8
	SLC39A8		SLC25A37
	SLC7A5		SLCO4A1
	SOCS3		SMIM25
	SOD2		SNAI1
	SPP1		SNX10
	SQLE		SOCS3
	SRGN		SOX4
	STARD4		STK17B
	STK38L		TAGAP
	TAGLN2		TCEAL9
	TCHH		TENT5A
	TFRC		THBD
	THBD		TIMP1
	TIMP1		TNFSF14
	TNF		TPM3
	TNFAIP3		TPM4
	TNIP3		TREM1
	TPM3		TUBA4A
	TPM4		TWISTNB
	TREM1		TXNIP
	TRIB1		UCP2
	TUBA1A		USP53
	TUBA1B		VASP
	UCP2		VCAN
	UGCG		ZFAND2A
	VASP		ZFP36L1
	VCAN		ZFP36L2
	VEGFA
	VIM
	VMP1
	YWHAZ
	ZFP36L1
